# Supplementary material for: Viral Vector Malaria Vaccines Induce High-Level T Cell and Antibody Responses in West African Children and Infants
Source: PubMed Central journal article supplement (PMC5368405; doi:10.1016/j.ymthe.2016.11.003), 2017-02-22
Supplement: mmc1.pdf [file mmc1.pdf]

## **Supplemental Information**

### **Viral Vector Malaria Vaccines Induce High-Level**

### **T Cell and Antibody Responses in West African**

### **Children and Infants**

**Carly M. Bliss, Abdoulie Drammeh, Georgina Bowyer, Guillaume S. Sanou, Ya Jankey Jagne, Oumarou Ouedraogo, Nick J. Edwards, Casimir Tarama, Nicolas Ouedraogo, Mireille Ouedraogo, Jainaba Njie-Jobe, Amidou Diarra, Muhammed O. Afolabi, Alfred B. Tiono, Jean Baptiste Yaro, Uche J. Adetifa, Susanne H. Hodgson, Nicholas A. Anagnostou, Rachel Roberts, Christopher J.A. Duncan, Riccardo Cortese, Nicola K. Viebig, Odile Leroy, Alison M. Lawrie, Katie L. Flanagan, Beate Kampmann, Egeruan B. Imoukhuede, Sodiomon B. Sirima, Kalifa Bojang, Adrian V.S. Hill, Issa Nébié, and Katie J. Ewer**

## Supplemental material

**a**

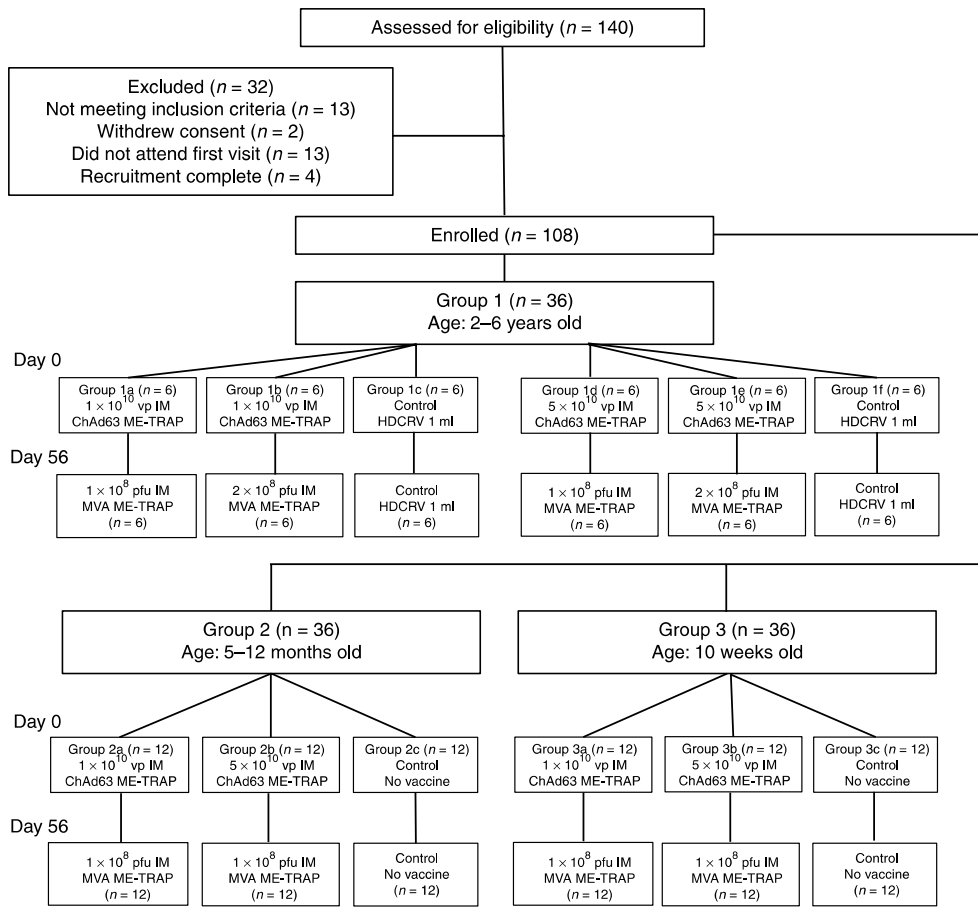

**Figure 1a Clinical trial design for groups 1,2 and 3 in the Gambia.**

**b**

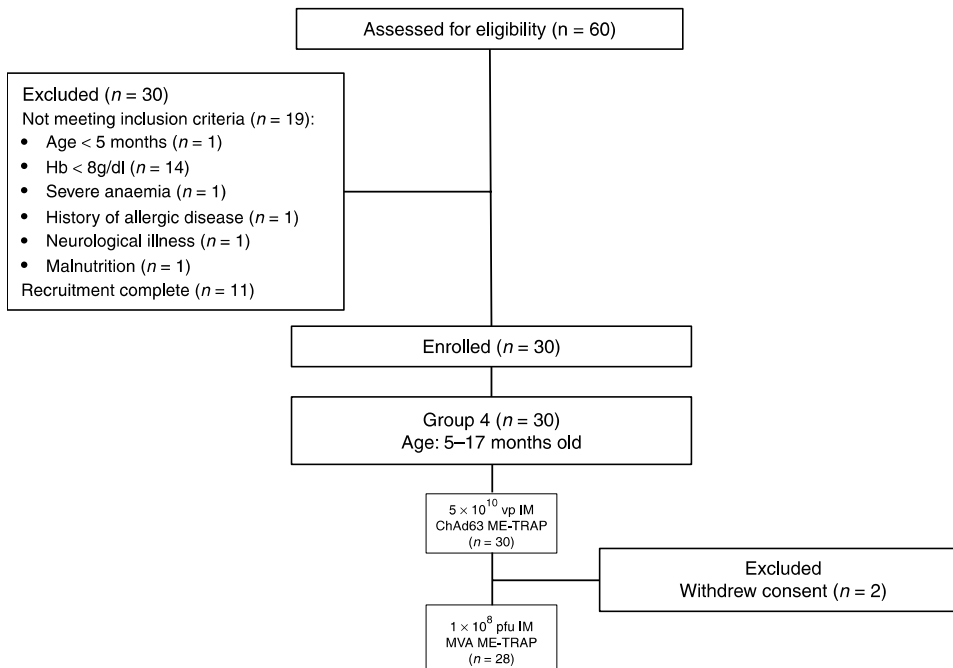

**Figure 1b. Clinical trial design for Group 4 in Burkina Faso.**

**Supplementary Figure 1. Flow of study design and volunteer recruitment to trials in the**

**Gambia (a) and Burkina Faso (b).** All immunizations were administered intramuscularly with sequential vaccines administered into the deltoid of alternating arms. The parents of two enrolled volunteers in group 4 withdrew consent between vaccinations and consent was also withdrawn for one child in each of group 1a and 1b after vaccination before follow-up was completed; all other volunteers completed study visits as scheduled. Abbreviations: ChAd63, simian adenovirus serotype63; ME-TRAP, multiple epitope–thrombospondin-related adhesion protein; MVA, modified vaccinia virus Ankara; pfu, plaque-forming units; vp, viral particles; HDCRV, human diploid cell rabies vaccine.

## Supplementary Figure 2. Sample gating strategy for flow cytometry.

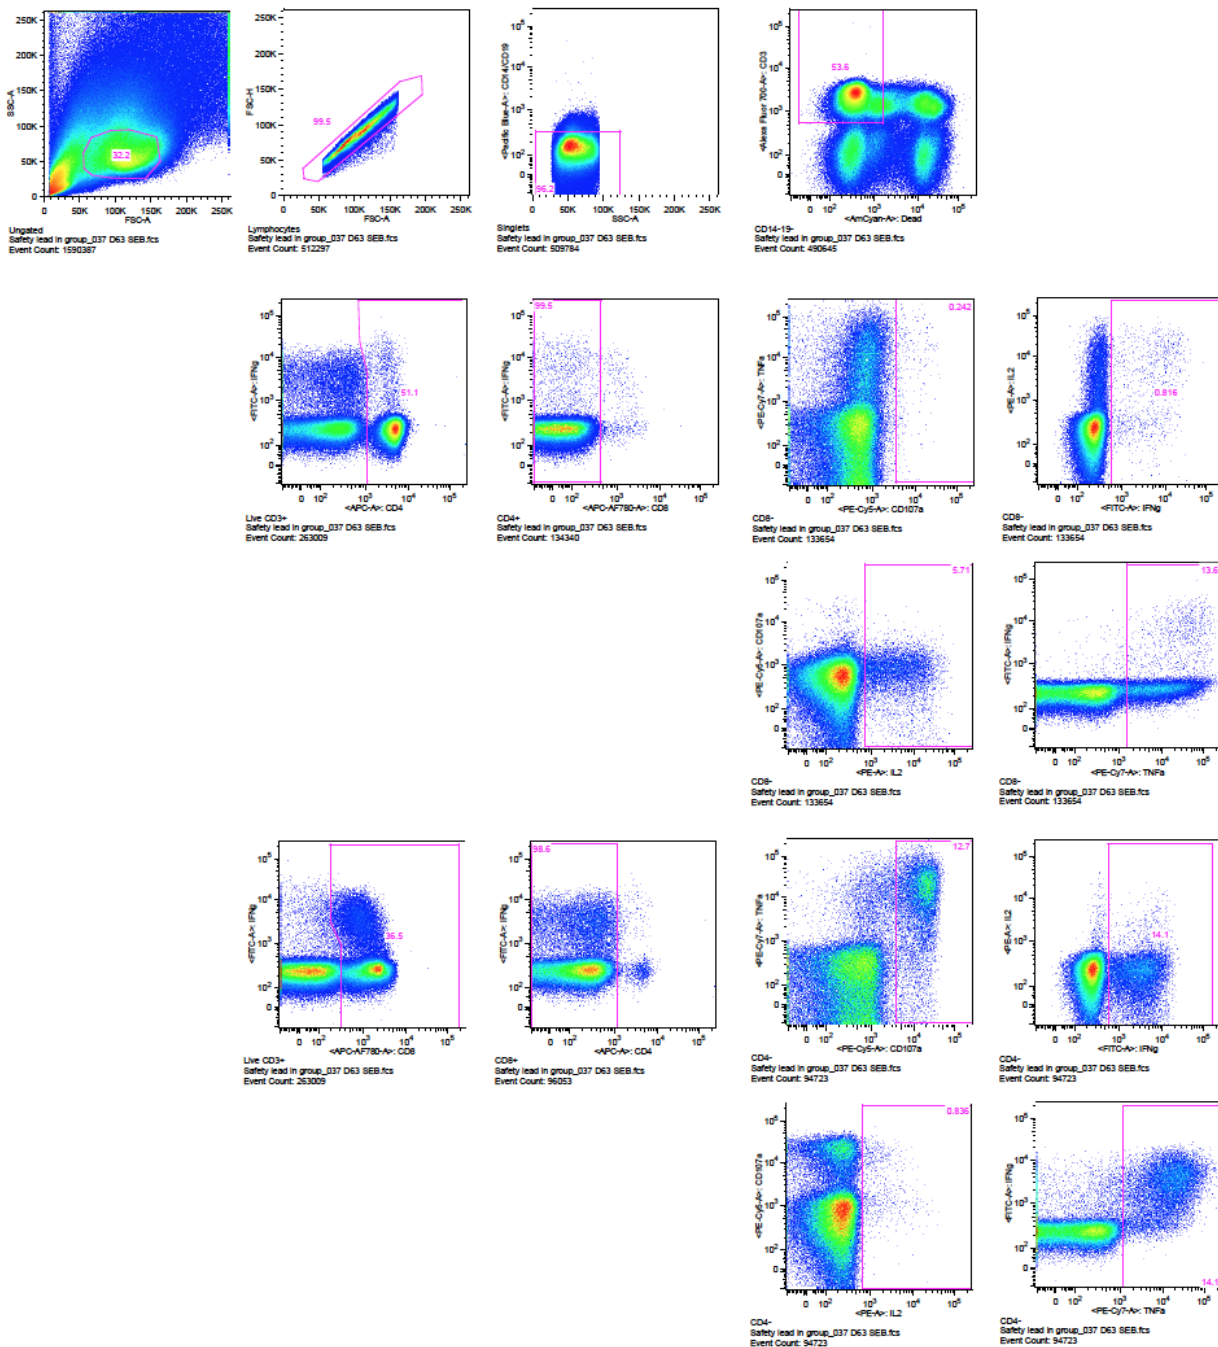

**Supplementary Table S1. Baseline demographics of enrolled trial participants**

| Site                      | Group                |    |    |    |    |    |                       |    |    |                 |    |    |                     |
|---------------------------|----------------------|----|----|----|----|----|-----------------------|----|----|-----------------|----|----|---------------------|
|                           | The Gambia           |    |    |    |    |    | Burkina Faso          |    |    |                 |    |    |                     |
| <b>Age group</b>          | 2-6 years            |    |    |    |    |    | 5-12 months           |    |    | 10 weeks        |    |    | 5-17 months         |
| <b>Study group</b>        | 1a                   | 1b | 1c | 1d | 1e | 1f | 2a                    | 2b | 2c | 3a              | 3b | 3c | 4                   |
| <b>N</b>                  | 6                    | 6  | 6  | 6  | 6  | 6  | 12                    | 12 | 12 | 12              | 12 | 12 | 30                  |
| <b>Median age, (IQR)</b>  | 44 months<br>(36-51) |    |    |    |    |    | 8 months<br>(5.5-8.5) |    |    | 10 weeks        |    |    | 44 weeks<br>(36-61) |
| <b>Gender ratio (M/F)</b> | 0.64<br>(23/13)      |    |    |    |    |    | 0.61<br>(22/14)       |    |    | 0.69<br>(25/11) |    |    | 0.5<br>(15/15)      |

**Supplementary Table S2.** Antibodies used in flow cytometry.

|  | <b>Antibody</b> | <b>Fluorochrome<br/>/Dye</b> | <b>Clone</b>               | <b>Supplier</b>   | <b>Product<br/>code</b> | <b>Final<br/>Dilution</b> |
|--|-----------------|------------------------------|----------------------------|-------------------|-------------------------|---------------------------|
|  |                 | LIVE/DEAD                    | Aqua amine<br>reactive dye | Invitrogen        | L34955                  | 1:200                     |
|  | CD4             | Allophycocyanin              | RPA-T4                     | eBioscience       | 17-0049-73              | 1:50                      |
|  | CD14            | eFluor 450                   | 61D3                       | eBioscience       | 48-0149                 | 1:100                     |
|  | CD19            | eFluor 450                   | HIB19                      | eBioscience       | 48-0199                 | 1:100                     |
|  | CD3             | Alexa Fluor 700              | OKT3                       | eBioscience       | 56-0037-42              | 1:100                     |
|  | CD8             | APC-eFluor780                | RPA-T8                     | eBioscience       | 47-0088-42              | 1:20                      |
|  | IFN $\gamma$    | FITC                         | 4S.B3                      | eBioscience       | 11-7319-82              | 1:200                     |
|  | IL-2            | PE                           | MQ1-17H12                  | eBioscience       | 12-7029-82              | 1:100                     |
|  | TNF $\alpha$    | PE Cy7                       | MAb11                      | BD<br>Biosciences | 25-7349-82              | 1:1000                    |
|  | CD107a          | PE-Cy5                       | eBioH4A3                   | eBioscience       | 15-1079-42              | 1:500                     |
